# Supplementary material for: Effects of Captivity and Season on the Gut Microbiota of the Brown Frog (Rana dybowskii)
Source: Front Microbiol. 2019 Aug 23;10:1912. doi: 10.3389/fmicb.2019.01912 (PMC6716059; doi:10.3389/fmicb.2019.01912)
Supplement: Supplementary file 2 [file Table_2.XLSX]

## Sheet: Sheet1
Tbale S2 Differences in relative abundant of the family level between CA and CS groups by LEfSe analysis.
Species name (Family)	group	Mean	LDA_value	P value
Micrococcaceae	CA	4.38787	3.9801	0.00381557
Rhodospirillaceae	CA	3.38412	3.19438	0.00931441
Neisseriaceae	CA	3.38708	3.18335	0.00320979
Burkholderiaceae	CA	2.84301	3.49512	0.021986
Prevotellaceae	CA	3.69057	3.488	0.00931441
Enterococcaceae	CA	4.94936	4.64732	0.0146765
Veillonellaceae	CA	4.14058	3.88126	0.00320979
Flavobacteriaceae	CA	4.59366	4.33937	0.0227516
Verrucomicrobiaceae	CA	4.00722	3.7595	0.00320979
Erysipelotrichaceae	CA	4.93524	4.38301	0.028351
Rikenellaceae	CA	4.70273	4.41502	0.00320979
Bacteroidales_S24_7_group	CA	3.25852	3.00931	0.00931441
FamilyI_o__SubsectionIV	CS	3.55716	3.29133	0.00152888
Carnobacteriaceae	CS	3.03179	3.19354	0.00152888
Campylobacteraceae	CS	3.97442	3.60936	0.0146176
Porphyromonadaceae	CS	5.20594	4.73903	0.0423571
Rhodobacteraceae	CS	2.23119	3.63121	0.0128188
Nannocystaceae	CS	1.84301	3.26396	0.0247685
Clostridiales_vadinBB60_group	CS	3.3912	3.14095	0.028075
norank_o__Mollicutes_RF9	CS	3.91734	3.59251	0.00441369
norank_c__Cyanobacteria	CS	3.85725	3.5501	0.00241594
norank_o__HTA4	CS	2.0349	3.66341	0.00149292
norank_o__JG30_KF_CM45	CS	2.00271	3.56235	0.0142816
Promicromonosporaceae	CS	2.94568	2.97483	0.00152888
Paenibacillaceae	CS	2.11922	3.67425	0.00149292
Leuconostocaceae	CS	3.26168	2.86773	0.0352976
Rhizobiaceae	CS	2.70168	3.28495	0.00356585
Bacillaceae	CS	4.73837	4.43011	0.00420874
Mycobacteriaceae	CS	3.11408	3.14853	0.00375221
Clostridiaceae_1	CS	4.14162	3.80112	0.00441369
Xanthomonadaceae	CS	2.76958	2.87766	0.0405624
Parachlamydiaceae	CS	1.58774	3.99741	0.00628518
FamilyI_o__SubsectionIII	CS	2.30374	3.21015	0.00682365
Brucellaceae	CS	2.95323	2.94953	0.038082
Rickettsiales_Incertae_Sedis	CS	3.27438	3.10484	0.00152888
Nakamurellaceae	CS	2.32013	3.44577	0.00149292
Bradyrhizobiaceae	CS	2.52224	2.95941	0.0429147
Acidaminococcaceae	CS	4.34499	4.05585	0.00441369
Ruminococcaceae	CS	5.06703	4.64541	0.00448325
Methylobacteriaceae	CS	2.68116	3.09035	0.00356585
Christensenellaceae	CS	2.71485	3.04031	0.013988
Nocardiaceae	CS	4.33624	4.02491	0.00441369
Desulfovibrionaceae		3.88747		-
Fusobacteriaceae		4.12024		-
Micromonosporaceae		2.46855		-
Deferribacteraceae		0		-
Nocardioidaceae		1.52079		-
Streptococcaceae		4.25182		-
Spirochaetaceae		2.15762		-
Bacteroidaceae		5.45439		-
Polyangiaceae		0		-
norank_o__Selenomonadales		3.34143		-
Solibacteraceae__Subgroup_3_		1.44161		-
Eubacteriaceae		3.06775		-
FFCH7168		1.04367		-
norank_c__S085		0		-
unclassified_c__Gammaproteobacteria		3.0771		-
norank_c__Acidobacteria		1.21976		-
Chlamydiaceae		0		-
Pseudonocardiaceae		0		-
Comamonadaceae		3.24779		-
Microbacteriaceae		3.37449		-
Alcaligenaceae		1.04367		-
Corynebacteriaceae		1.96795		-
Enterobacteriaceae		5.15522		-
norank_p__Atribacteria		1.44161		-
Lachnospiraceae		5.15641		-
Unknown_Family_o__Unknown_Order_c__Unknown_Class_p__Saccharibacteria		1.74264		-
Mycoplasmataceae		0.742643		-
Oxalobacteraceae		2.28671		-
Tsukamurellaceae		1.79186		-
Moraxellaceae		4.17401		-
Streptomycetaceae		1.88877		-
Peptostreptococcaceae		4.00104		-
Planococcaceae		0.888771		-
unclassified_p__Firmicutes		1.21976		-
Cryptosporangiaceae		0		-
Coriobacteriaceae		3.55756		-
unclassified_o__Selenomonadales		1.44161		-
Propionibacteriaceae		2.26116		-
Vibrionaceae		0		-
Dermabacteraceae		1.52079		-
Pseudomonadaceae		4.4923		-
norank_o__Gastranaerophilales		2.10437		-
Deinococcaceae		0		-
Acidimicrobiales_Incertae_Sedis		0		-
Hyphomicrobiaceae		1.21976		-
unclassified_o__Chlamydiales		0		-
Shewanellaceae		3.25852		-
Flammeovirgaceae		0		-
Sphingomonadaceae		1.91873		-
Anaerolineaceae		0		-
Anaeroplasmataceae		2.48301		-
unclassified_o__Sphingobacteriales		0		-
norank_o__P_palmC41		0		-
Peptococcaceae		2.49083		-
Caldilineaceae		0.888771		-
unclassified_k__norank		0		-
unclassified_o__Bacteroidales		0		-
norank_o__Opitutae_vadinHA64		0		-
Thermaceae		0		-
unclassified_o__Rhizobiales		0		-
unclassified_o__Clostridiales		2.28671		-
Family_XIII		3.21393		-
Bifidobacteriaceae		2.04367		-
Caulobacteraceae		2.35543		-
Chitinophagaceae		1.44161		-
0319_6G20		0		-
unclassified_o__Micrococcales		2.14058		-
Mitochondria		2.71577		-
Acetobacteraceae		0		-
Acidimicrobiaceae		0		-
Synergistaceae		1.99792		-
Xanthomonadales_Incertae_Sedis		0		-
Planctomycetaceae		1.49083		-
Sphingobacteriaceae		3.02368		-
Caldicoprobacteraceae		1.88877		-
Geodermatophilaceae		1.36589		-
Elusimicrobiaceae		0		-
Lactobacillaceae		3.34687		-
Staphylococcaceae		1.78404		-
norank_p__Saccharibacteria		2.4054		-
Aeromonadaceae		4.10569		-
